# Supplementary material for: Protein–inorganic nano hybrid sheets of Pd embedded BSA as a robust catalyst in water for oxidase mimic activity and C–C coupling reactions, and as a sustainable material for micromolar sensing of dopamine
Source: Royal Society of Chemistry journal article supplement (doi:10.1039/d0ma00512f), 2020-01-01
Supplement: d0ma00512f1.pdf [file d0ma00512f1.pdf]

## Supporting Information

### Protein – Inorganic Nano Hybrid Sheets of Pd Embedded BSA as Robust Catalyst in Water for Oxidase Mimic Activity and C-C Coupling Reactions, and as Sustainable Material for Micromolar Sensing of Dopamine

Sirilata Polepalli<sup>a</sup>, Bhawna Uttam<sup>a</sup> and Chebrolu Pulla Rao<sup>b\*</sup>

<sup>a</sup>*Bioinorganic Laboratory, Department of Chemistry, Indian Institute of Technology Bombay, Powai, Mumbai – 400 076, India, E-mail: [cprao@iitb.ac.in](mailto:cprao@iitb.ac.in)*

<sup>b</sup>*Department of Chemistry, Indian Institute of Technology Tirupati, Settipalli post, Tirupati– 517506, Andhra Pradesh, India, E-mail: [cprao@iittp.ac.in](mailto:cprao@iittp.ac.in)*

### Contents

|                                                                                                    |    |
|----------------------------------------------------------------------------------------------------|----|
| SI01. TEM images of naked Pd_NPs, Pd_BSA <sub>1</sub> and Pd_BSA <sub>2</sub> .....                | S2 |
| SI02. TEM images of Pd_NPs@BSA <sub>sheet</sub> .....                                              | S2 |
| SI03. EDS and elemental mapping of Pd_NPs@BSA <sub>sheet</sub> .....                               | S3 |
| SI04. AFM and SEM micrographs of Pd_NPs and Pd_NPs@BSA <sub>sheet</sub> .....                      | S3 |
| SI05. Oxidase mimic activity of Pd_NPs@BSA <sub>sheet</sub> at pH 7.4 and<br>enzyme kinetics ..... | S4 |
| SI06. Optimised conditions for Suzuki coupling .....                                               | S4 |
| SI07. Substrate scope of Pd_NPs@BSA <sub>sheet</sub> catalyst in Suzuki coupling reactions         | S5 |
| SI08. Characterisation data of Suzuki coupling reaction products.....                              | S6 |
| SI09. <sup>1</sup> H-NMR and GC-MS spectral data of all the cross coupled products .....           | S8 |

**SI01. TEM Images of Naked Pd\_NPs, Pd\_BSA<sub>1</sub> and Pd\_BSA<sub>2</sub>.**

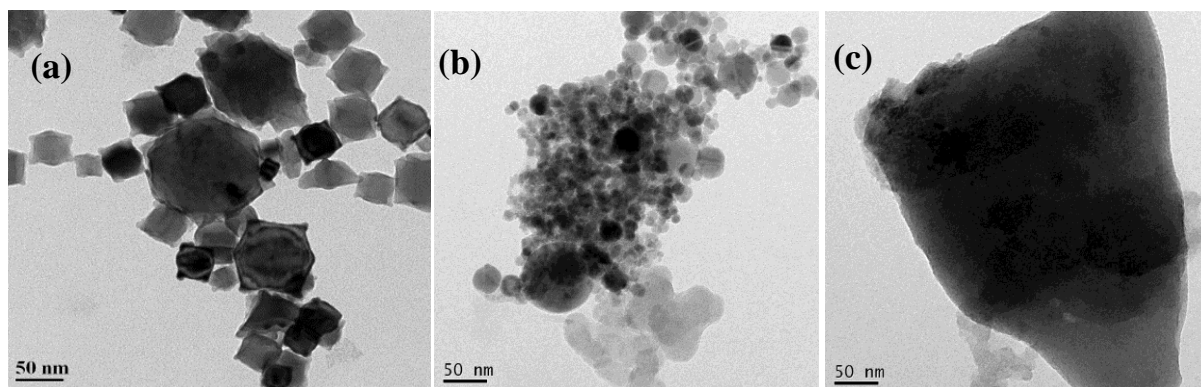

**Figure S01.** TEM images of (a) Naked Pd\_NPs. (b) Spherical aggregates of Pd\_BSA<sub>1</sub>. (c) Initiation of smaller sheet formation in Pd\_BSA<sub>2</sub>.

**SI02. TEM Images of Pd\_NPs@BSA<sub>sheet</sub>**

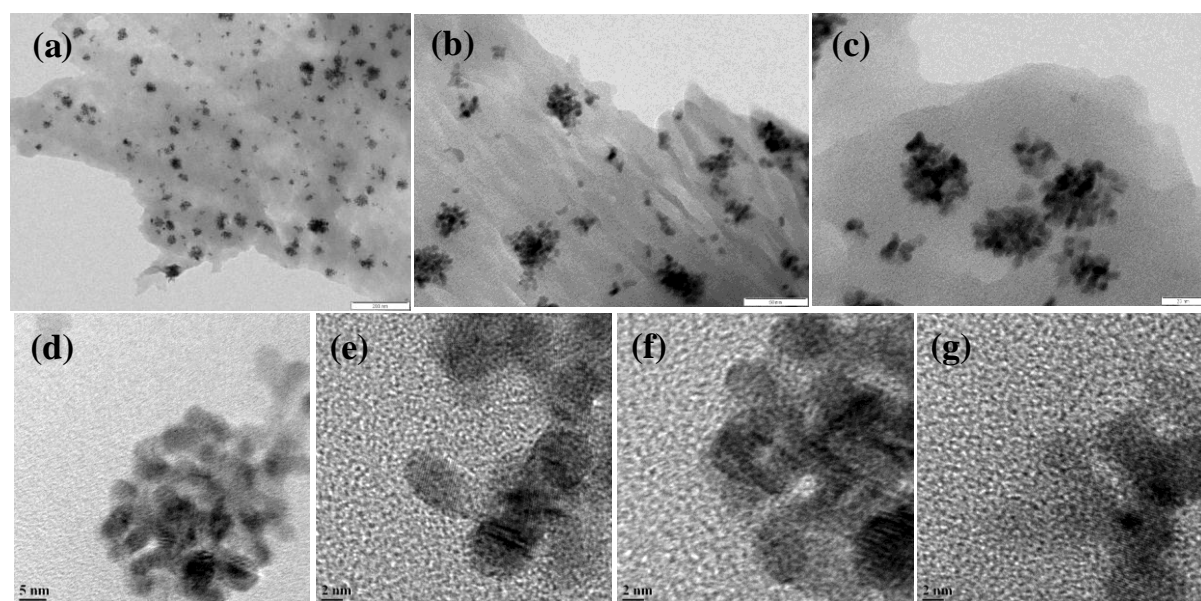

**Figure S02.** (a-c) are the TEM images of Pd\_NPs@BSA<sub>sheet</sub> sheets. (d-g) HR-TEM of Pd\_NPs embedded in Pd\_NPs@BSA<sub>sheet</sub>. Scale bar of (a) is (-200 nm), (b) is (-50 nm), (c) is (-20 nm), (d) is 5 nm, (e-g) is 2 nm.

### SI03. EDS and Elemental Mapping of Pd\_NPs@BSA<sub>sheet</sub>.

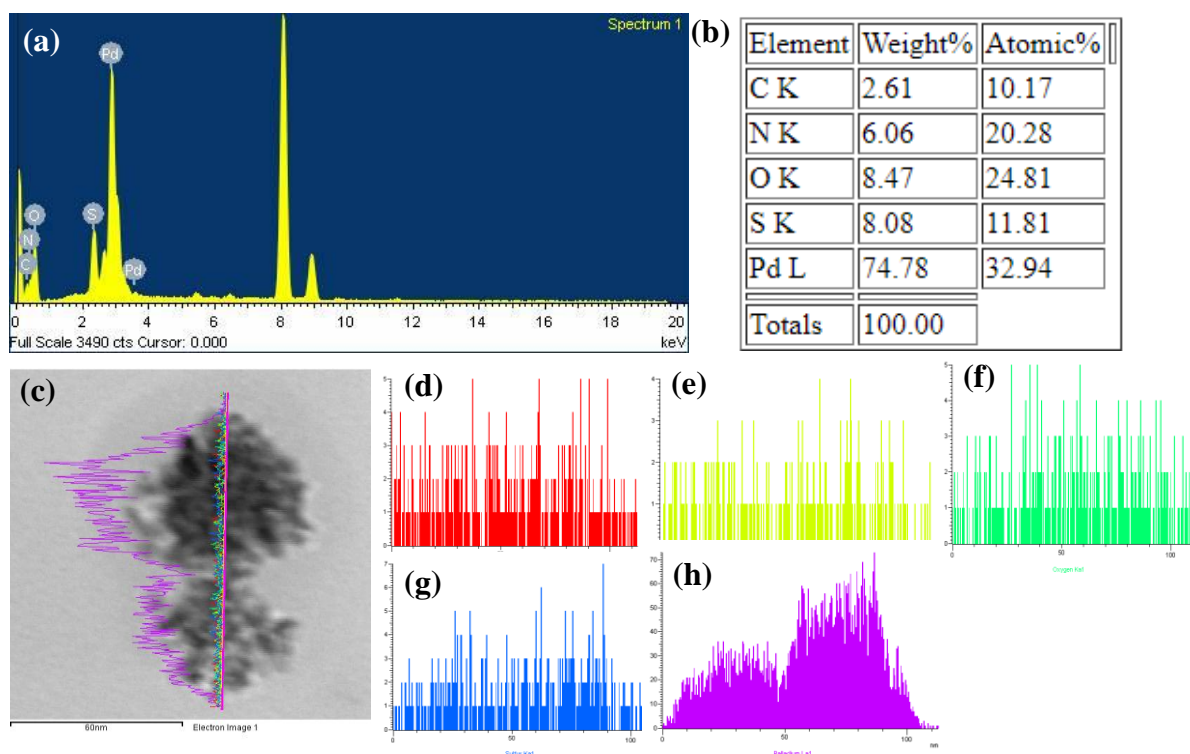

**Figure S03.** (a) EDS of Pd\_NPs@BSA<sub>sheet</sub>. (b) Percentage element composition of Pd\_NPs@BSA<sub>sheet</sub> from EDS. (c) Aggregate of Pd\_NPs@BSA<sub>sheet</sub> area where line mapping is performed. Line mapping of (d) Carbon (red) (e) Nitrogen (yellow) (f) Oxygen (green) (g) Sulphur (blue) (h) Palladium (purple).

### SI04. AFM and SEM Micrographs of Pd\_NPs and Pd\_NPs@BSA<sub>sheet</sub>.

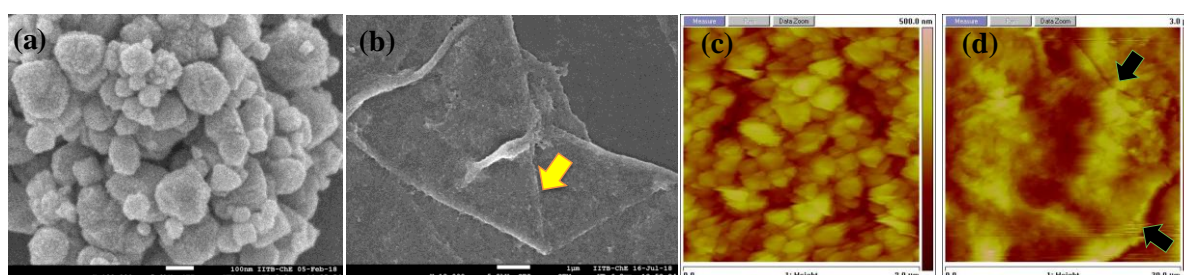

**Figure S04.** SEM images of (a) Naked Pd\_NPs (scale bar -100 nm). (b) Hybrid Pd\_NPs@BSA<sub>sheet</sub>. Folds in the sheets are marked with yellow arrow. (scale bar – 1 μm). AFM images of (c) Naked Pd\_NPs (scale bar – 2 μm). (d) Pd\_NPs@BSA<sub>sheet</sub> where the edges are marked with black arrow. (scale bar – 30 μm).

### SI05. Oxidase mimic activity of Pd\_NPs@BSA<sub>sheet</sub> at pH 7.4 and enzyme kinetics

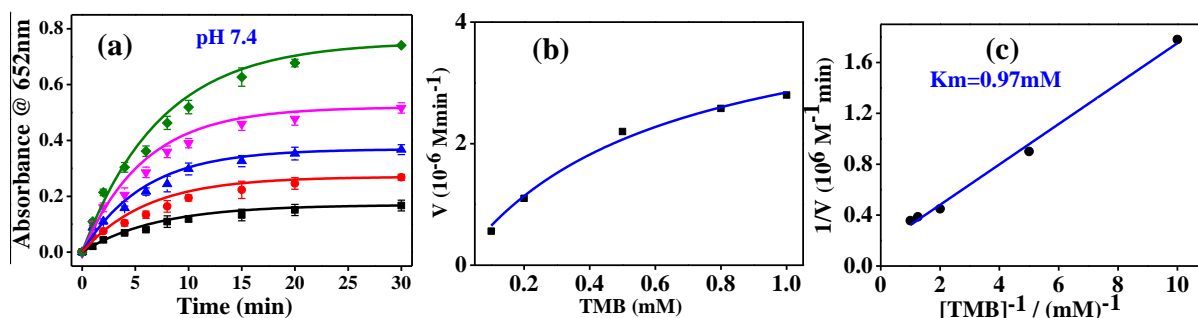

**Figure S05.** Oxidase activity of Pd\_NPs@BSA<sub>sheet</sub> with varying substrate (TMB) concentrations at pH 7.4. [black – 0.1 mM, red – 0.3 mM, blue – 0.5 mM, magenta – 0.8 mM, green – 1 mM] using 100 µg/mL Pd\_NPs@BSA<sub>sheet</sub> as catalyst at following time points: 1, 2, 4, 6, 8, 10, 15, 20, 30 minutes respectively. (b) steady state kinetics and (c) double reciprocal plots for calculation of  $K_m$  and  $V_{max}$  for oxidase activity of Pd\_NPs@BSA<sub>sheet</sub> at pH 7.4.

### SI06. Optimised Reaction Conditions for Suzuki Coupling.

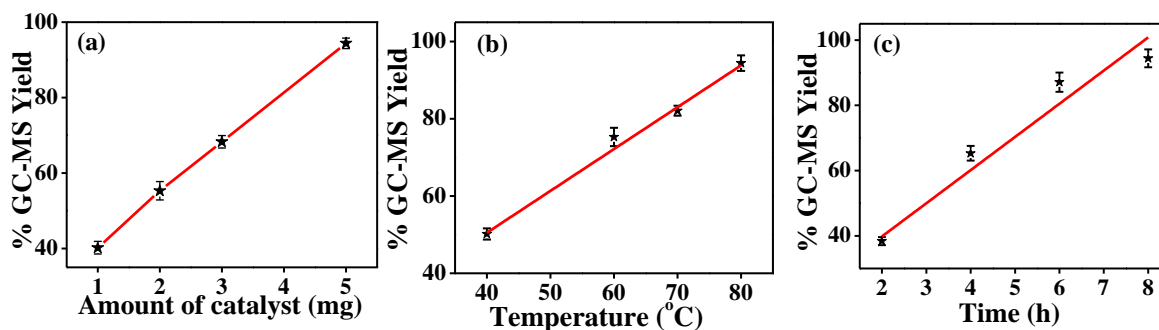

**Figure S06.** Optimised reaction conditions of Suzuki coupling for biphenyl product formation with varying conditions obtained from GC-MS yield (a) Amount of catalyst, (b) Temperature and (c) Time.

**SI07. Substrate Scope of Pd\_NPs@BSA<sub>sheet</sub> Catalyst in Suzuki Coupling Reactions.****Table S01.** Suzuki coupling reactions of iodobenzene with derivatives of phenylboronic acid catalyzed by Pd\_NPs@BSA<sub>sheet</sub>.

| Pd_NPs@BSA <sub>sheet</sub> |   |              |                            |                        |
|-----------------------------|---|--------------|----------------------------|------------------------|
| Entry                       | Y | Z<br>Product | % Con.<br>/Sel.            | TOF<br>h <sup>-1</sup> |
| 1                           |   | 1a           | 94.4/<br>100               | 980                    |
| 2                           |   | 1b           | 98.5/<br>100               | 1022                   |
| 3                           |   | 1c           | 93.6/<br>99.5              | 972                    |
| 4                           |   | 1d           | 96.8/<br>100               | 1005                   |
| 5                           |   | 1e           | 95.2/<br>100               | 988                    |
| 6                           |   | 1f           | 92.7/<br>90.5              | 962                    |
| 7                           |   | 1g           | 96.6/<br>100               | 1003                   |
| 8                           |   | 1h           | 86.6/<br>80.2 <sup>a</sup> | 899                    |
| 9                           |   | 1i           | 95.8/<br>100               | 994                    |
| 10                          |   | 1j           | 96.8/<br>77.6 <sup>b</sup> | 1005                   |
| 11                          |   | 1k           | 85.4/<br>83.6 <sup>c</sup> | 886                    |

Reaction conditions: A = iodobenzene (0.49 mmol) (1 equiv), B = phenylboronic acid (0.74 mmol), K<sub>2</sub>CO<sub>3</sub> (0.98 mmol), Pd\_NPs@BSA<sub>sheet</sub> (5mg, 0.059 mol%), temperature (80 °C), time (8h). Major by-products: <sup>a</sup>2,2'-dimethoxy-1,1'-biphenyl, <sup>b</sup>3,3',5,5'-tetramethyl-1,1'-biphenyl, <sup>c</sup>3,3',4,4'-tetramethoxy-1,1'-biphenyl. Yield was calculated based on the GC-MS data. Turn over frequency calculated as (moles of product) / (moles of catalyst in terms of Pd × time in h)

### SI08. Characterisation data of Suzuki Coupling Reaction Products.

**Characterization Data of 1,1'-Biphenyl (1a).** White solid; mp: 68–70°C, <sup>1</sup>H NMR (500 MHz, CDCl<sub>3</sub>): δ (ppm) 7.60 (dd, *J* = 8.5, 1.5 Hz, 4H), 7.45 (t, *J* = 8.0 Hz, 4H), 7.35 (t, *J* = 7.5 Hz, 2H).

**Characterization Data of 4-fluoro-1, 1'-Biphenyl (1b).** White solid; mp: 75-79 °C, <sup>1</sup>H NMR (400 MHz, CDCl<sub>3</sub>) δ (ppm) 8.22 (dd, *J* = 6.0, 2.4 Hz, 3H), 7.76–7.72 (m, 1H), 7.22–7.16 (m, 4H), 7.12–7.06 (m, 1H).

**Characterization Data of 4-Chloro-1, 1'-Biphenyl (1c).** White solid; mp: 77-79°C; <sup>1</sup>H NMR (400 MHz, CDCl<sub>3</sub>): δ (ppm) 7.50-7.46 (m, 4H), 7.42-7.39 (m, 5H).

**Characterization Data of 4-methyl-1, 1'-biphenyl (1d).** White solid; mp: 44-46 °C; <sup>1</sup>H NMR (500 MHz, CDCl<sub>3</sub>): δ (ppm) 7.58 (d, *J* = 7.6 Hz, 2H), 7.49 (d, *J* = 8.5 Hz, 2H), 7.43 (t, *J* = 7.5 Hz, 2H), 7.31 (t, *J* = 7.5 Hz, 1H), 7.25 (2H, d, *J* = 7.6 Hz), 2.40 (s, 3H).

**Characterization Data of [[1, 1'-biphenyl]-4-carbaldehyde (1e).** White solid; mp: 57-59 °C, <sup>1</sup>H NMR (400 MHz, CDCl<sub>3</sub>): δ (ppm) 10.06 (s, 1H), 7.95 (dt, *J* = 8.0, 1.6 Hz, 2H), 7.75 (dd, *J* = 6.4, 1.6 Hz, 2H), 7.64 (dt, *J* = 7.2, 1.5 Hz, 2H), 7.5-7.40 (m, 3H).

**Characterization Data of 1-[[1-1'biphenyl]-4-yl] ethane-1-one (1f).** White solid; mp: 116–118°C; <sup>1</sup>H NMR (500 MHz, CDCl<sub>3</sub>): δ (ppm) 8.03 (dt, *J* = 8.5 Hz, 2.0 Hz, 2H), 7.69 (dt,

$J = 8.5$  Hz, 2 Hz, 2H), 7.63 (dd,  $J = 8.0$  Hz, 1.5 Hz, 2H), 7.47 (t,  $J = 7.5$  Hz, 2 H), 7.42-7.39 (m, 1H), 2.64 (s, 3H).

**Characterization Data of [1, 1'-biphenyl]-4-carbonitrile (1g).** White solid; mp: 82-85 °C,  $^1\text{H}$  NMR (500 MHz,  $\text{CDCl}_3$ ):  $\delta$  (ppm) 7.74–7.67 (m, 4H), 7.59 (d,  $J = 8.0$  Hz, 2H), 7.51–7.41 (m, 3H).

**Characterization Data of 2-methoxy-1,1'-biphenyl (1h).** White solid; mp 31-33°C;  $^1\text{H}$  NMR (500 MHz,  $\text{CDCl}_3$ ):  $\delta$  (ppm) 7.54 (d,  $J = 8.0$ , 2H), 7.42 (t,  $J = 7.5$ , 2H), 7.35–7.32 (m, 3H), 7.04 (t,  $J = 7.0$ , 1H), 6.99 (d,  $J = 8.5$ , 1H), 3.82 (3H, s).

**Characterization Data of 3-(trifluoromethyl)-1,1'-biphenyl (1i).**  $^1\text{H}$  NMR (500 MHz,  $\text{CDCl}_3$ ):  $\delta$  (ppm) 8.42 (d, 1H), 8.02 (s, 1H), 7.94-7.83 (m, 2H), 7.78-7.26 (m, 5H).

**Characterization Data of 3, 5-dimethyl-1, 1'-biphenyl (1j).**  $^1\text{H}$  NMR (400 MHz,  $\text{CDCl}_3$ ):  $\delta$  (ppm) 7.58 (d,  $J = 7.2$  Hz, 2H), 7.43 (t,  $J = 7.6$  Hz, 2H), 7.35 (t,  $J = 7.2$  Hz, 1H), 7.24 (s, 2H), 7.02 (s, 1H), 2.39 (s, 6H).

**Characterization Data of 3, 4-dimethoxy-1, 1'-biphenyl (1k).** White solid; mp: 43-46°C;  $^1\text{H}$  NMR (400 MHz,  $\text{CDCl}_3$ ):  $\delta$  (ppm) 7.56 (dd,  $J = 8.0$ , 1.2 Hz, 2H), 7.43 (t,  $J = 7.2$  Hz, 2H), 7.34-7.30 (m, 1H), 7.17-7.11 (m, 2H), 6.95 (d,  $J = 8.4$  Hz, 1H), 3.96 (s, 3H), 3.93 (s, 3H).





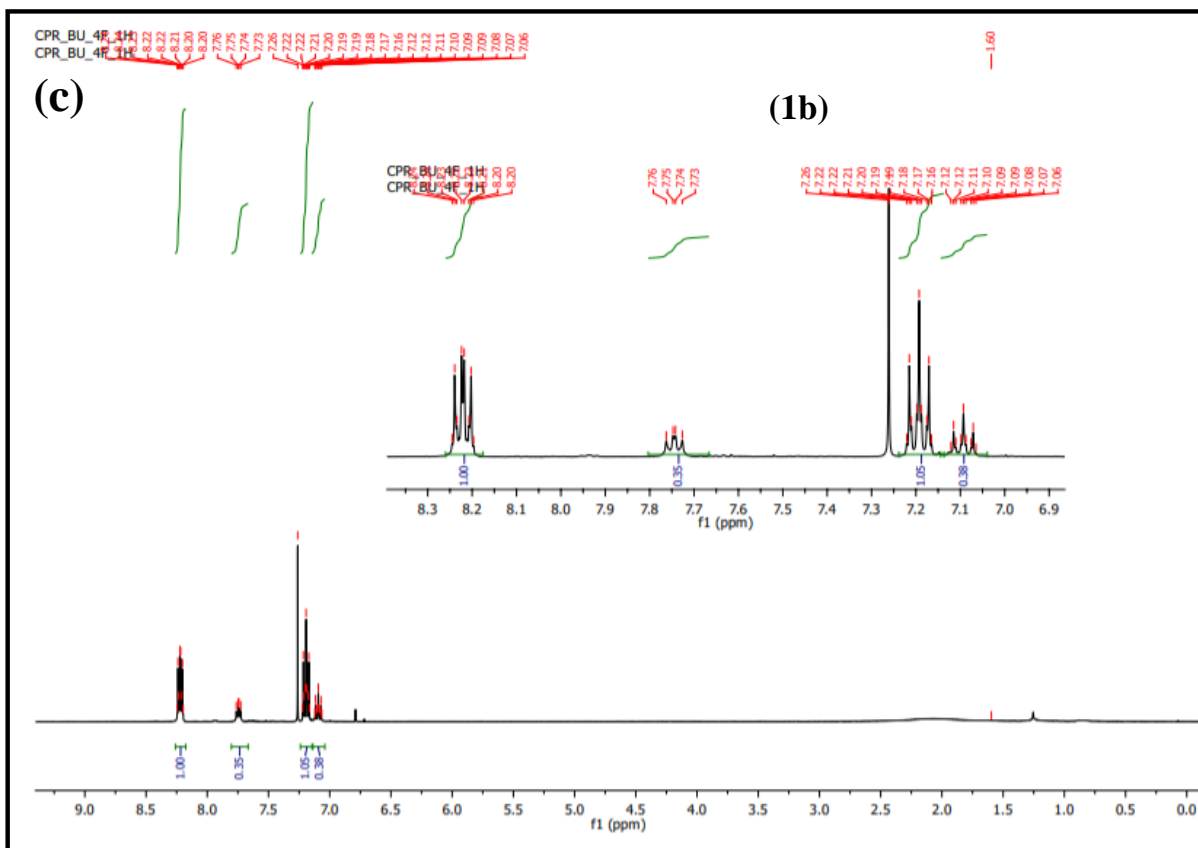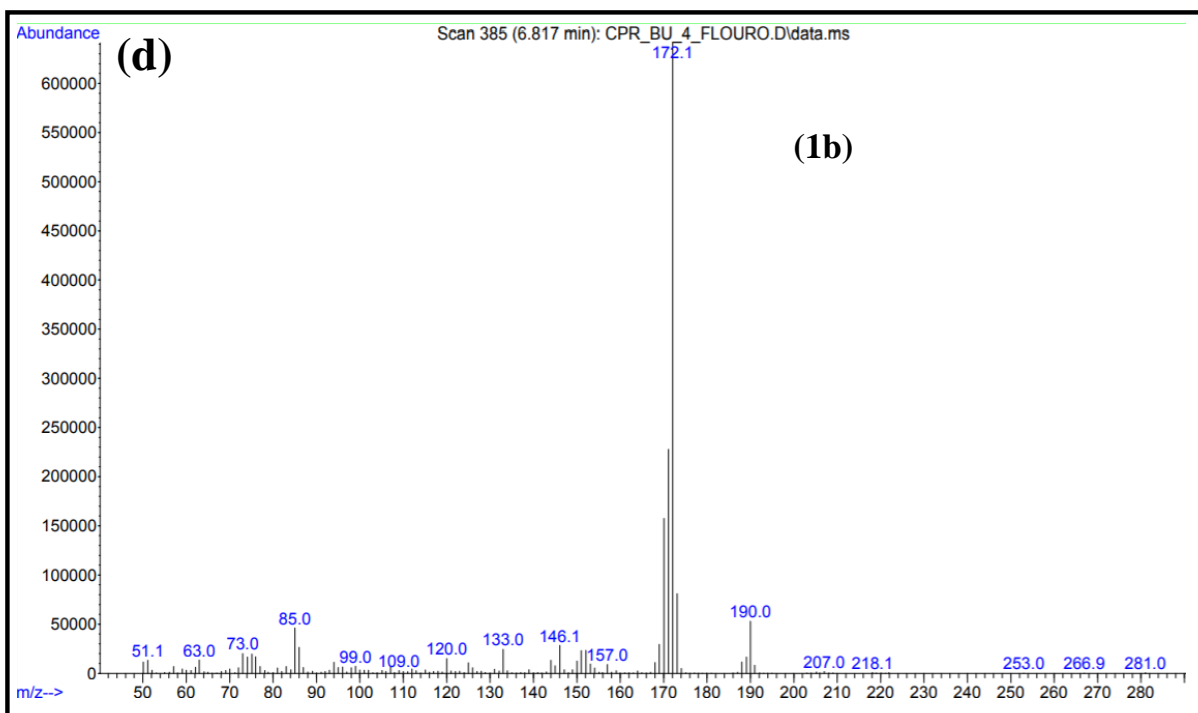

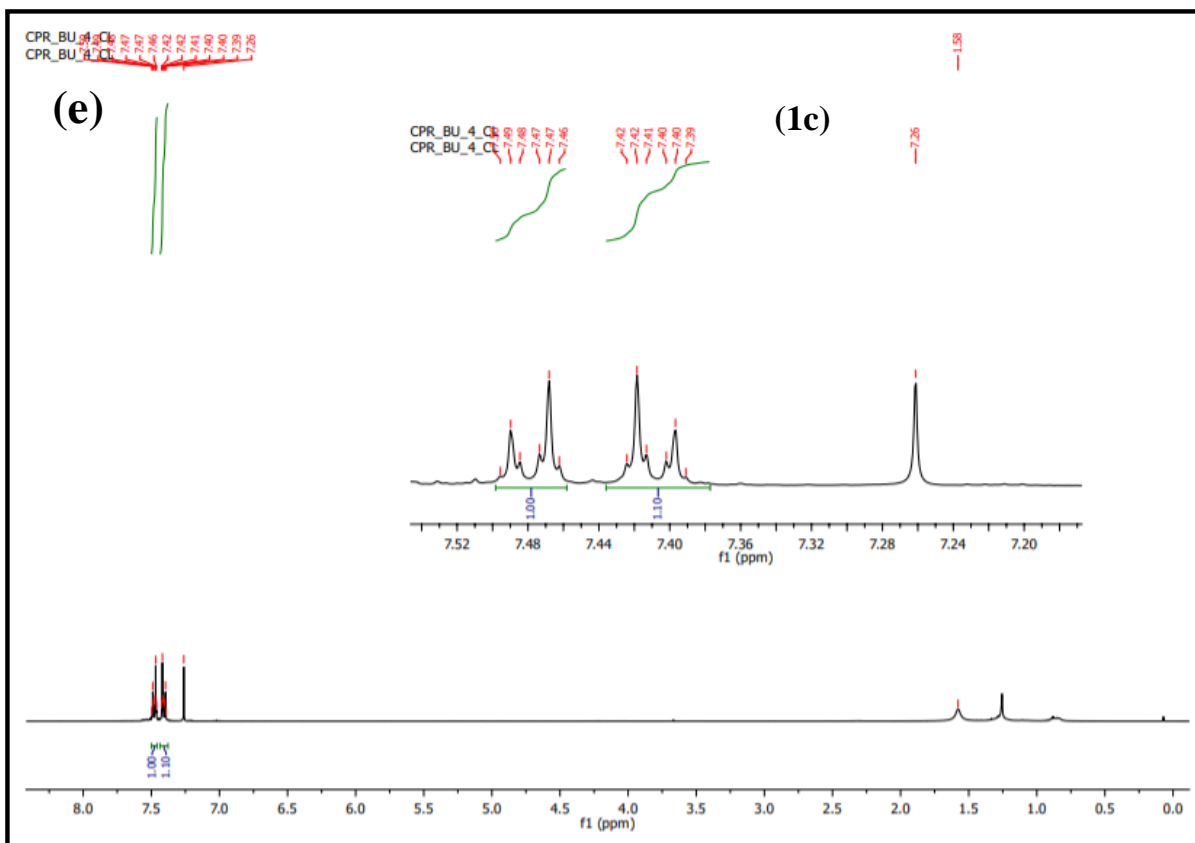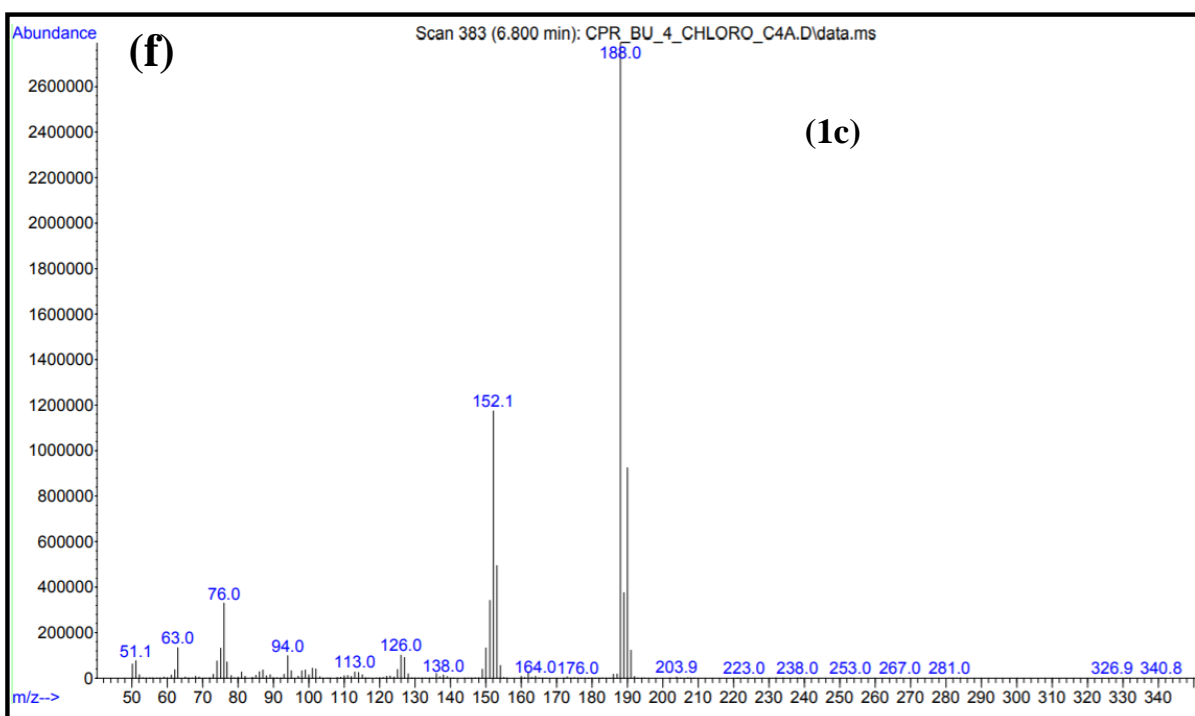





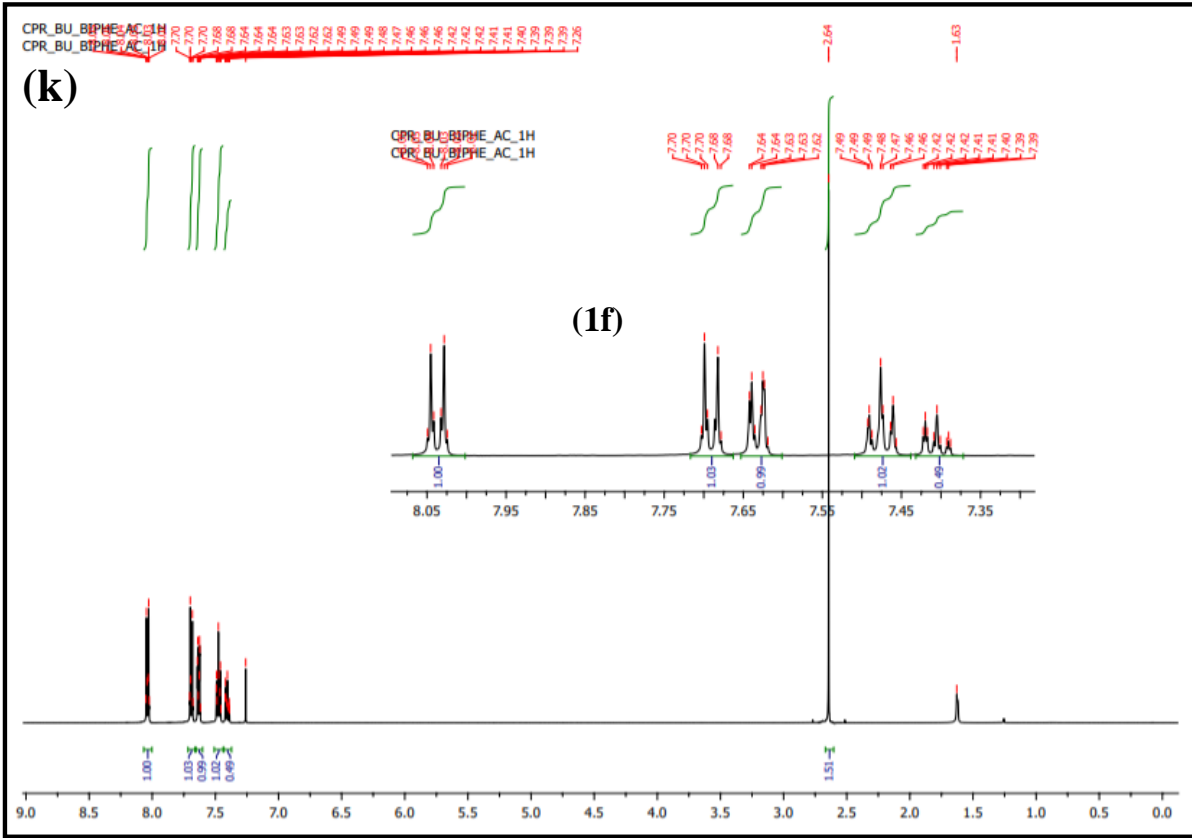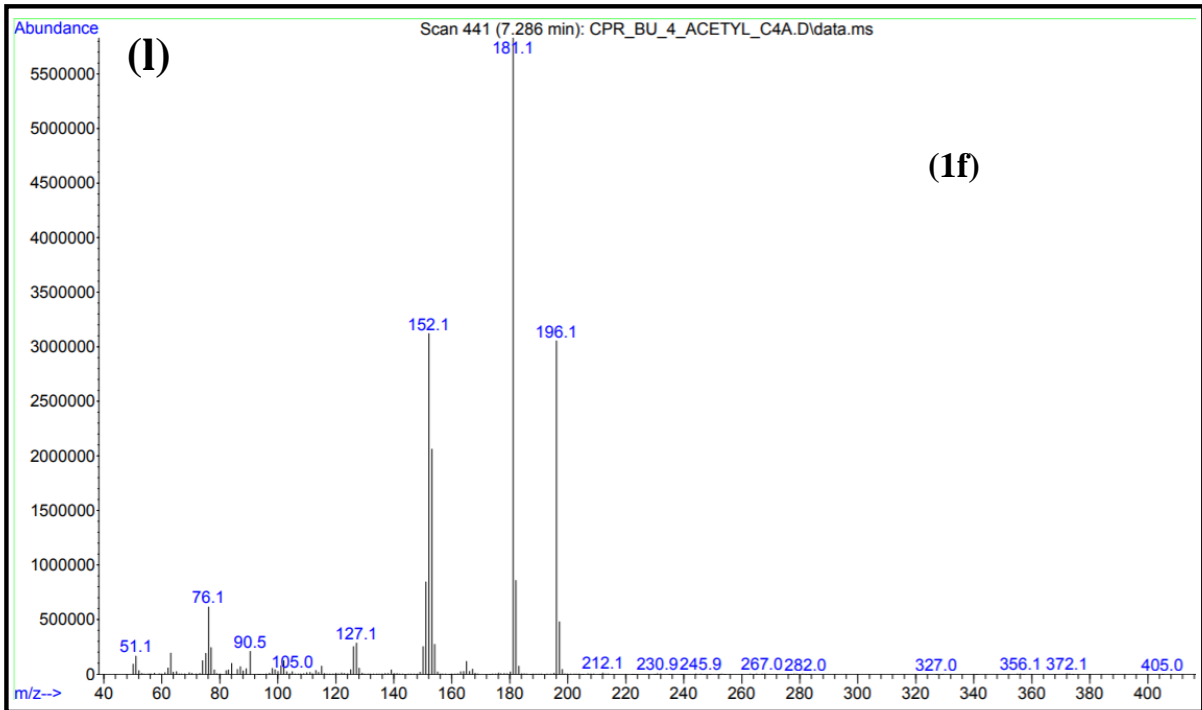

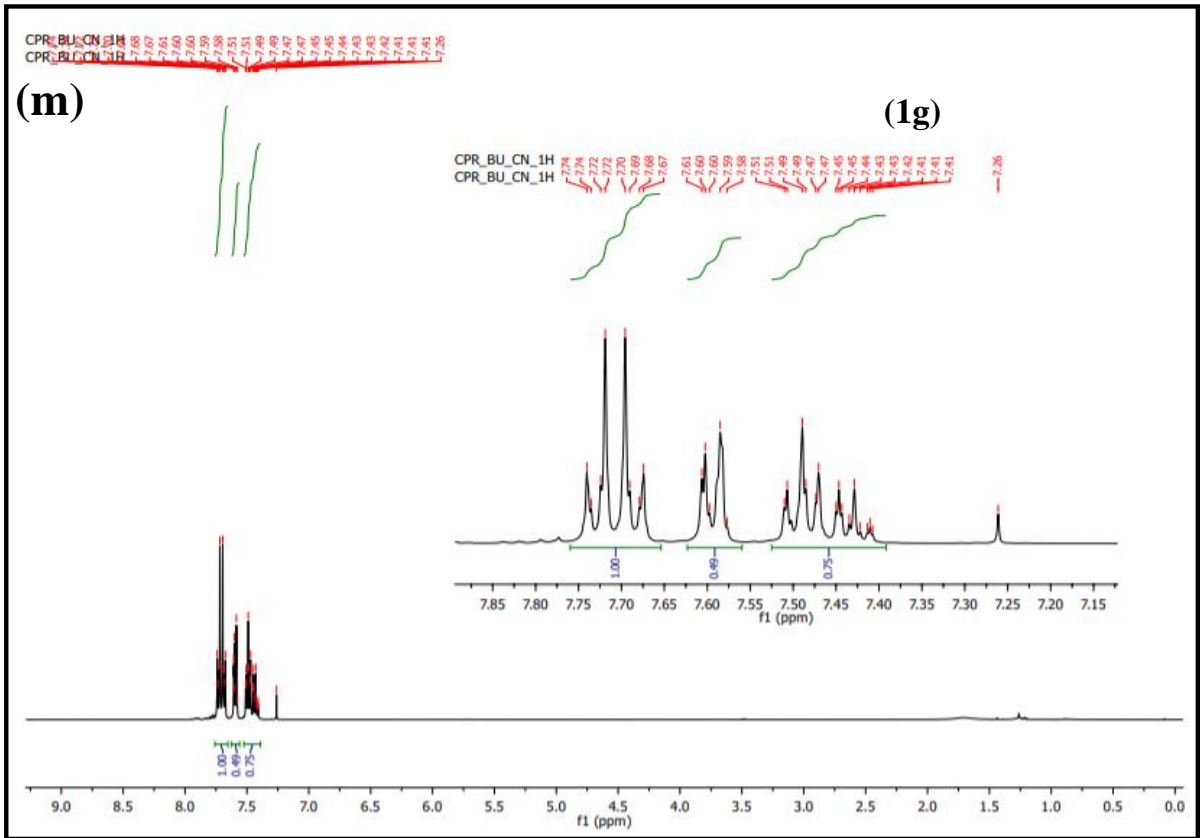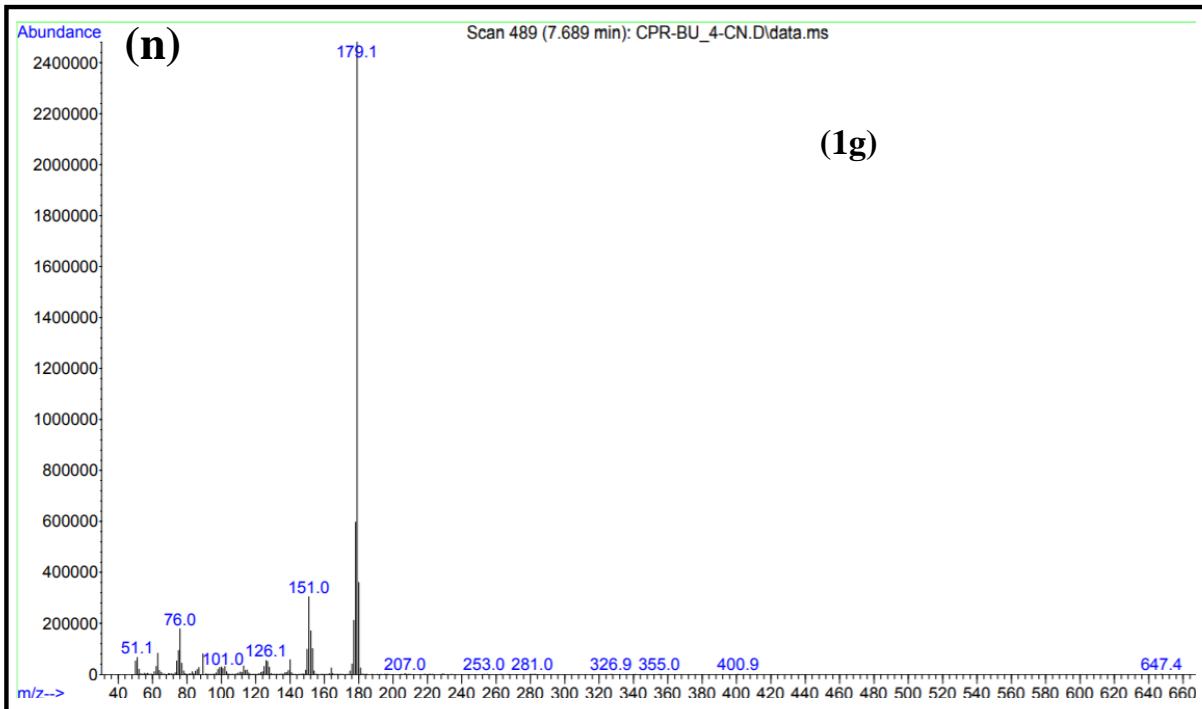



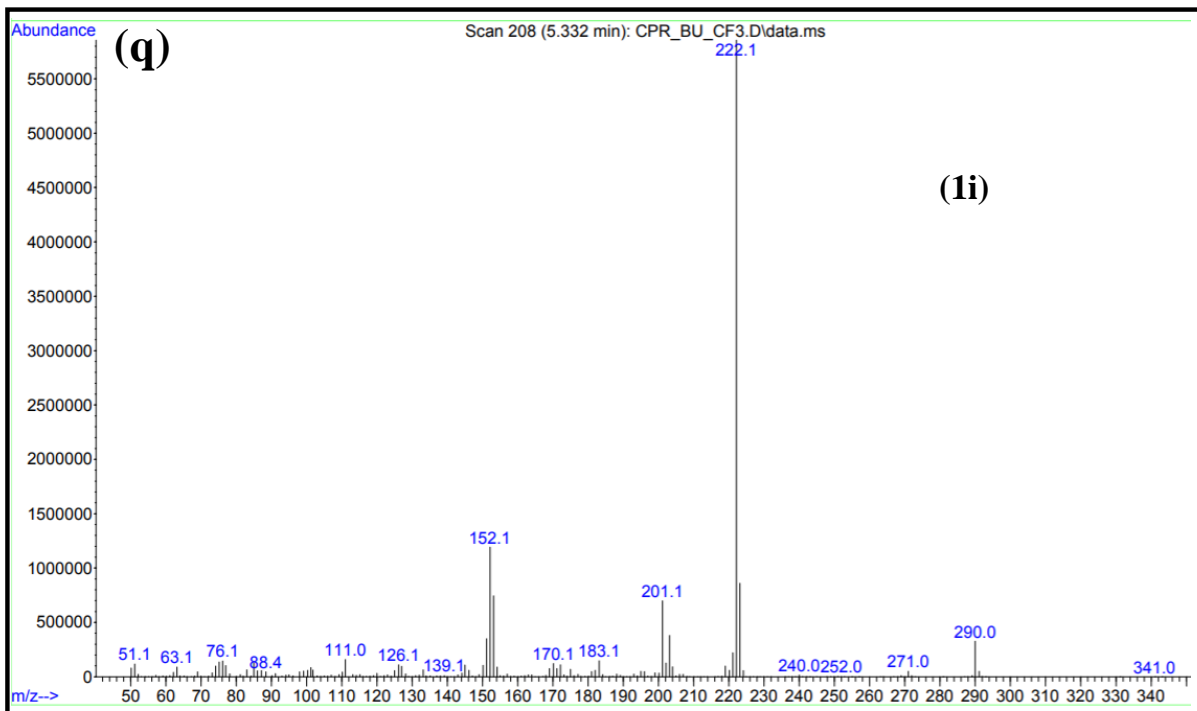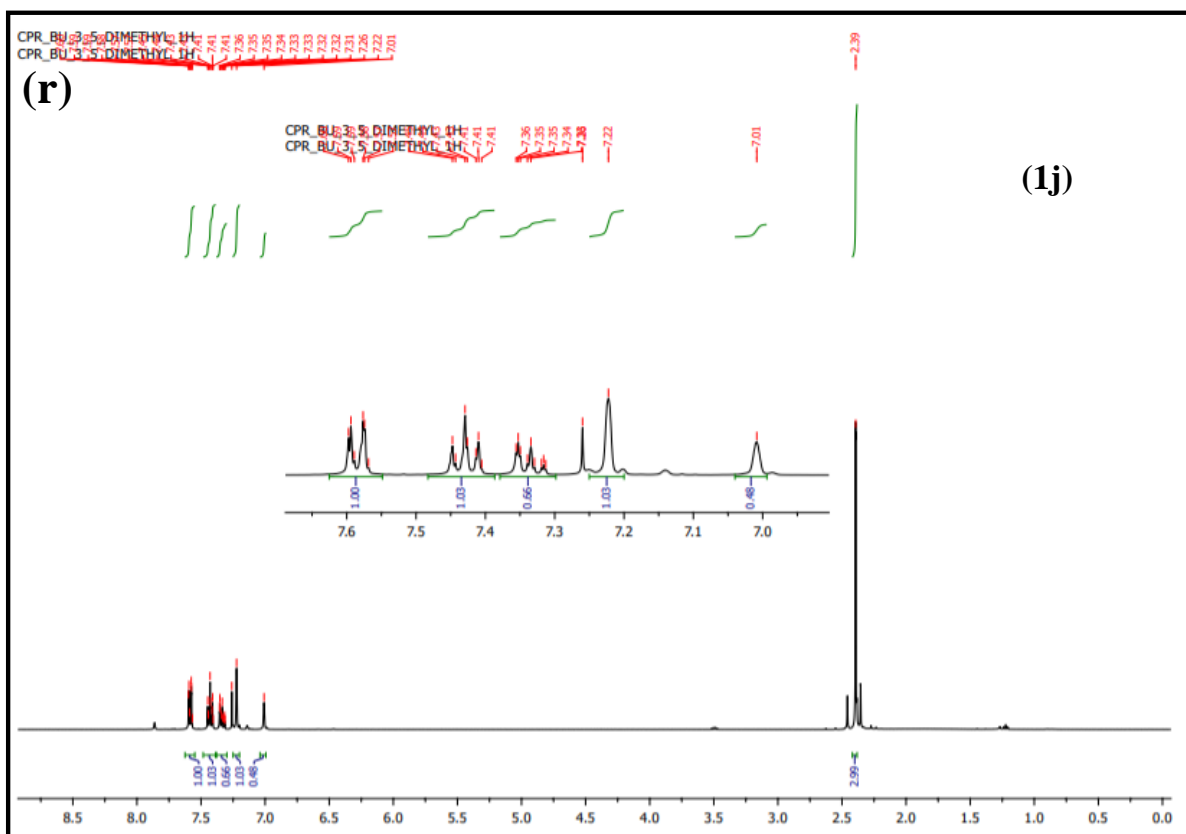



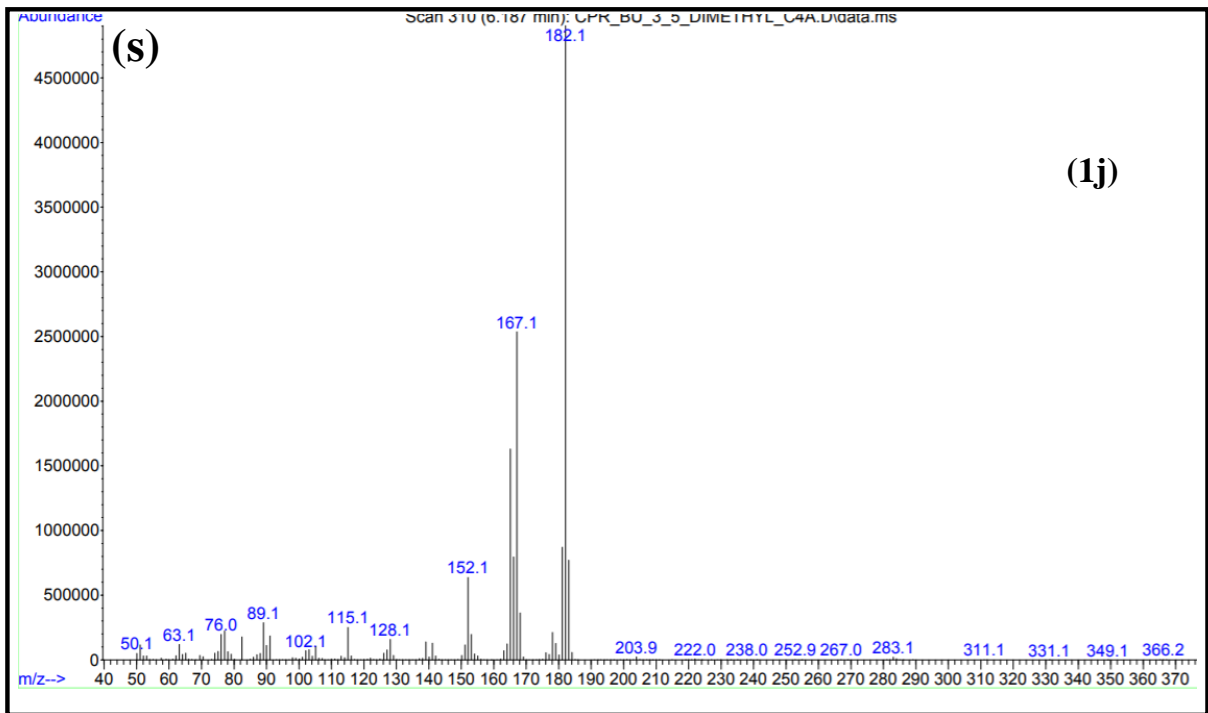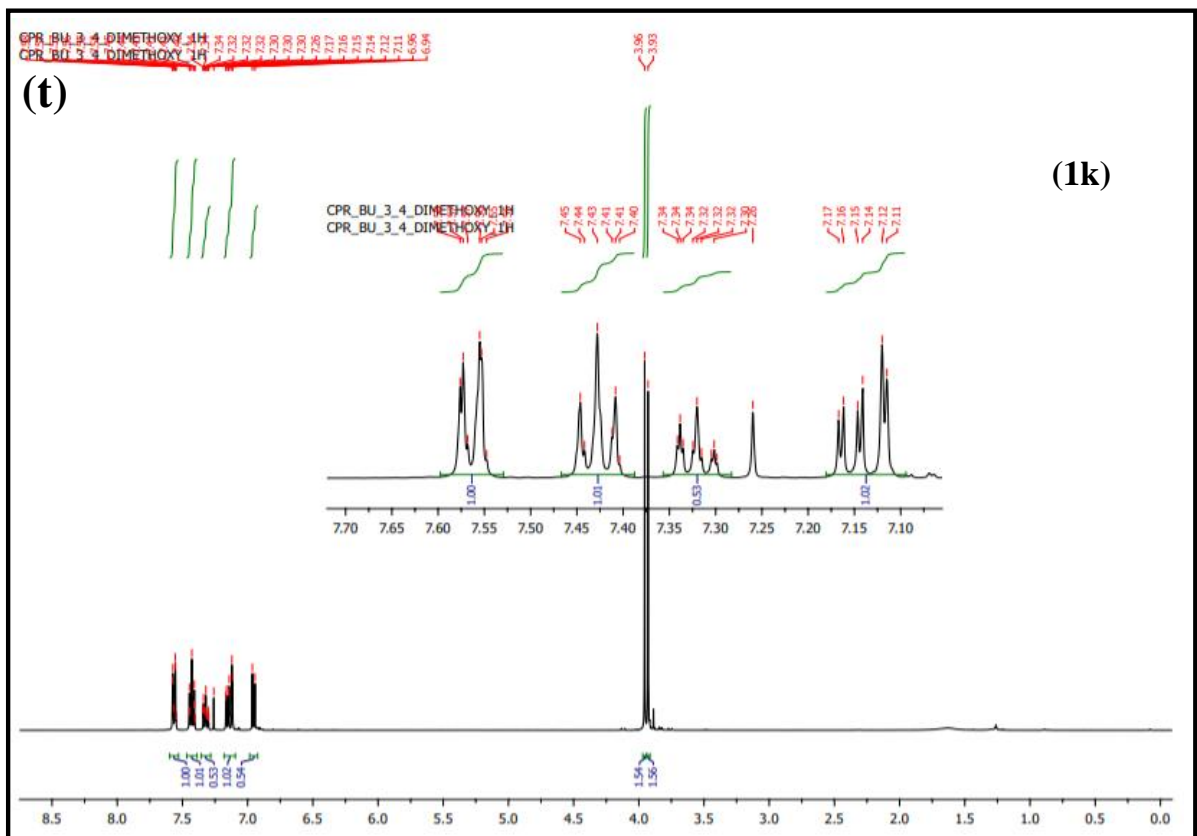

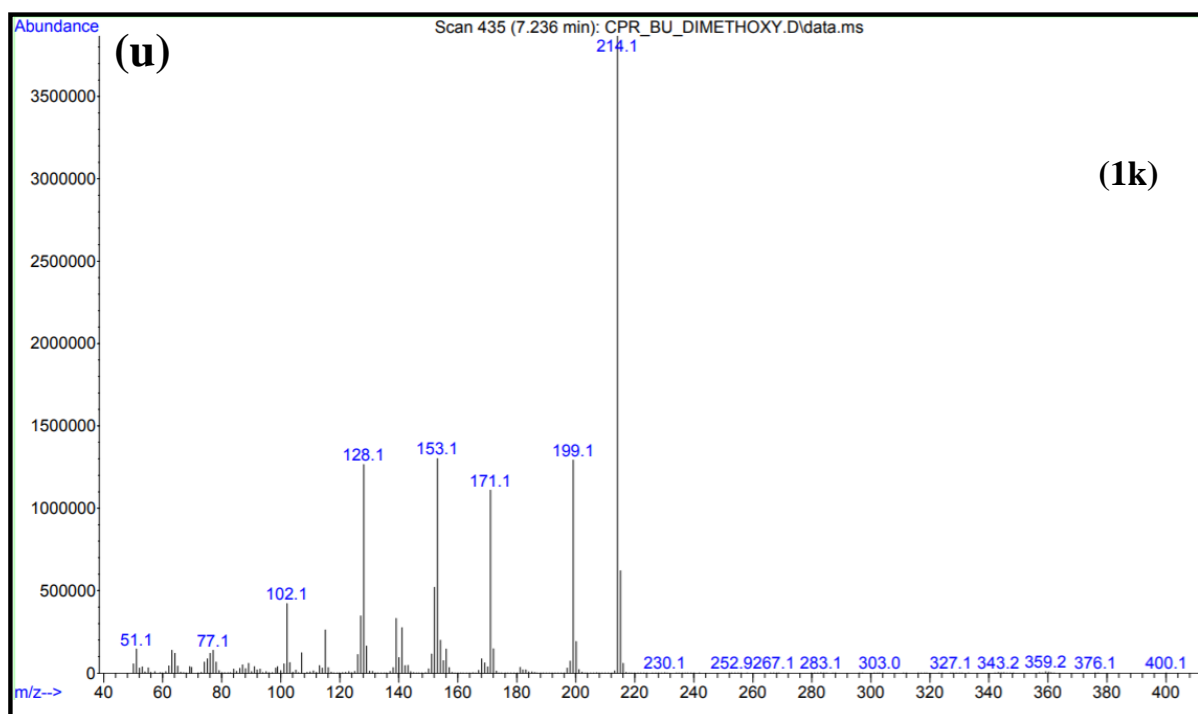

**Figure S07.** (a to u) are the  $^1\text{H}$  spectra and GC-MS of Suzuki cross coupled products.
